# Supplementary material for: Synergistic modulation of the thermoelectric performance of melt-spun p-type Mg2Sn via Na2S and Si alloying
Source: Royal Society of Chemistry journal article supplement (doi:10.1039/d1ta10582e), 2022-01-01
Supplement: d1ta10582e1.pdf [file d1ta10582e1.pdf]

## Supporting Information

### Synergistic Modulation on the Thermoelectric Performance of Melt-spun p-Type Mg<sub>2</sub>Sn via Na<sub>2</sub>S and Si Alloying

Yuling Huang<sup>a,1</sup>, Sikang Zheng<sup>a,1</sup>, Huijun Liao<sup>e</sup>, Saisai Qiao<sup>a</sup>, Guang Han<sup>\*b,c,e</sup>, Guoyu Wang<sup>d</sup>, Zhengyong Huang<sup>e</sup>, Jian Li<sup>e</sup>, Xu Lu<sup>\*a,c</sup>, Xiaoyuan Zhou<sup>\*a,c,f</sup>

<sup>a</sup> Center for Quantum Materials & Devices and College of Physics, Chongqing University, Chongqing 401331, P. R. China

<sup>b</sup> College of Materials Science and Engineering, Chongqing University, Chongqing 400044, P. R. China

<sup>c</sup> National Engineering Research Center for Magnesium Alloys, Chongqing University, Chongqing, 400044, P. R. China

<sup>d</sup> Chongqing Institute of Green and Intelligent Technology, Chinese Academy of Sciences, Chongqing 400714, P. R. China

<sup>e</sup> State Key Laboratory of Power Transmission Equipment & System Security and New Technology, Chongqing University, Chongqing 400030, P. R. China

<sup>f</sup> Analytical and Testing Center, Chongqing University, Chongqing 401331, P. R. China

Corresponding authors: Xiaoyuan Zhou, [xiaoyuan2013@cqu.edu.cn](mailto:xiaoyuan2013@cqu.edu.cn)

Guang Han, [guang.han@cqu.edu.cn](mailto:guang.han@cqu.edu.cn)

Xu Lu, [luxu@cqu.edu.cn](mailto:luxu@cqu.edu.cn)

<sup>1</sup> These two authors contribute equally to this work.

## Calculation of density of state effective mass by single parabolic band model <sup>1</sup>

$$S(\eta) = \frac{k_B}{e} \left[ \frac{(r + 5/2)F_{(r+2/3)}(\eta)}{(r + 3/2)F_{(r+1/2)}(\eta)} - \eta \right]$$

$$n_H = \frac{1}{eR_H} = \frac{(2m^* k_B T)^{3/2} (r + 3/2)^2 F_{(r+1/2)}^2(\eta)}{3\pi^2 \hbar^3 (2r + 3/2) F_{(2r+1/2)}(\eta)}$$

where  $\eta$ ,  $k_B$ ,  $e$ ,  $r$ ,  $R_H$ ,  $m^*$ ,  $T$  and  $\hbar$  are reduced Fermi level, the Boltzmann constant, the electronic charge, carrier scattering parameter, the Hole coefficient, effective mass, absolute temperature and the reduced Pulank constant, respectively.

$$F_j(\eta) = \int_0^\infty \frac{\xi^j d\xi}{1 + e^{(\xi - \eta)}}$$

where  $F_j(\eta)$  is the Fermi integral.

## Calculation of thermal conductivity by Debye-Callaway model

In order to understand the impacts of different phonon scattering process and lattice thermal conductivity, Debye-Callaway model and the relaxation time are carried out here to calculate the contribution of different scattering effects<sup>2,3</sup>. Within the Debye-Callaway model, the lattice thermal conductivity can be expressed via the following equation:

$$\kappa_L = \frac{k_B}{2\pi^2 v} \left( \frac{k_B}{\hbar} \right)^3 T^3 \int_0^{\theta_D/T} \frac{x^4 e^x}{\tau_c^{-1} (e^x - 1)^2} dx$$

where  $k_B$  is the Boltzmann constant,  $v$  is the the average sound velocity,  $\hbar$  is the reduced Plank constant,  $T$  is the absolute temperature,  $\theta_D$  is the Debye temperature,  $\tau_c$  is the phonon relaxation time, and  $x$  is defined as  $x = \hbar\omega/k_B T$ , where  $\omega$  is the phonon frequency.

In this work, we took Umklapp scattering ( $\tau_U$ ), grain boundary scattering ( $\tau_B$ ), and point defect scattering ( $\tau_{PD}$ ) into consideration. The phonon relaxation time can be given by:

$$\tau_U^{-1} = \frac{\hbar\gamma^2 \omega^2 T}{Mv^2 \theta_D} \exp\left(-\frac{\theta_D}{3T}\right)$$

$$\tau_B^{-1} = \frac{v}{L}$$

$$\tau_{PD}^{-1} = \frac{V\omega^4}{4\pi v^2} \Gamma$$

$$\tau_c^{-1} = \tau_U^{-1} + \tau_B^{-1} + \tau_{PD}^{-1} = B\omega^2 T e^{-\theta_D/3T} + \frac{v}{L} + A\omega^4$$

where  $M$  is average atomic mass,  $\gamma$  is the Gruneisen parameter,  $\theta_D$  is the Debye temperature,  $L$  is grain size,  $V$  is average atomic volume, and  $\Gamma$  is point defect scattering parameter of  $(\text{Mg}_2\text{Sn}_{0.9}\text{Si}_{0.1})_{0.93}(\text{Na}_2\text{S})_{0.07}^4$ .

The mass-fluctuation phonon-scattering parameter can be given by:

$$\Gamma = \sum_i f_i \left(1 - \frac{M_i}{M}\right)^2$$

where  $M$  is the mass of a unit cell,  $f_i$  is the fraction of unit cells with mass  $M_i$ , and  $M$  is the average mass of all cells.

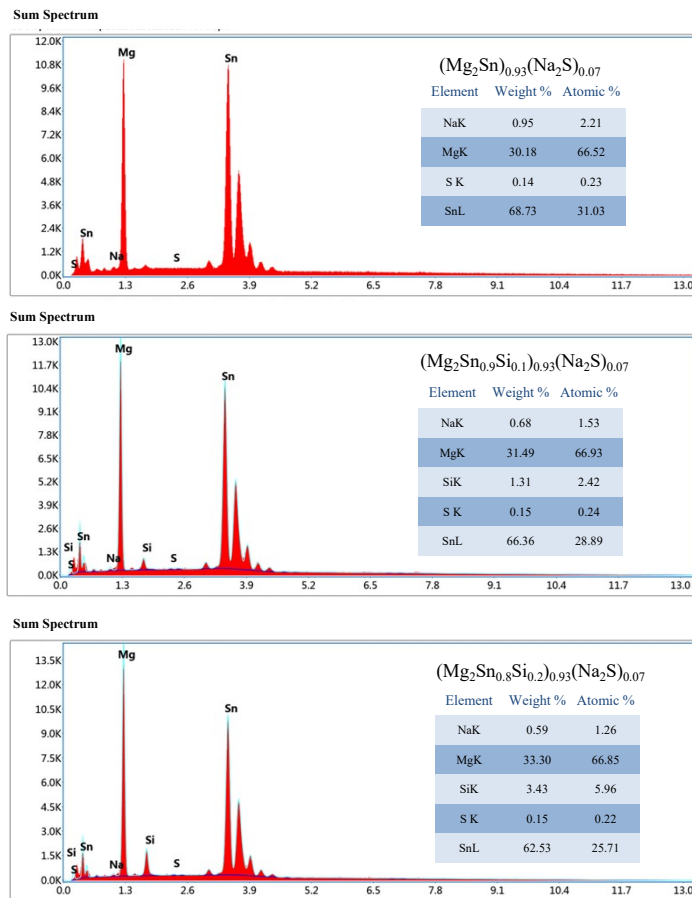

**Figure S1** EDS spectra and chemical compositions of  $(\text{Mg}_2\text{Sn}_{1-y}\text{Si}_y)_{0.93}(\text{Na}_2\text{S})_{0.07}$  ( $y = 0, 0.1, 0.2$ ).

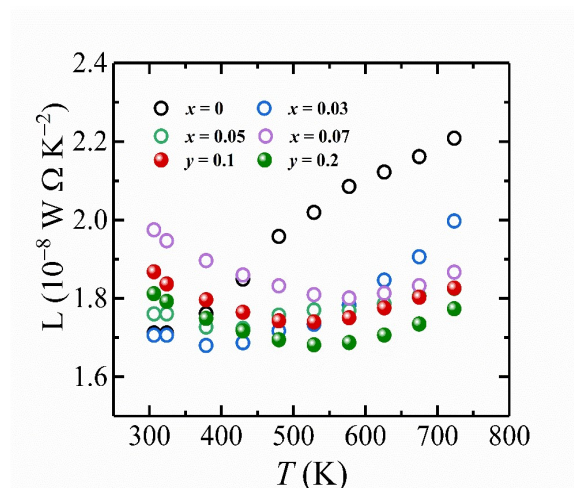

**Figure S2** Temperature dependence of calculated Lorentz constant for  $(\text{Mg}_2\text{Sn})_{1-x}(\text{Na}_2\text{S})_x$  ( $x = 0, 0.03, 0.05, 0.07$ ), and  $(\text{Mg}_2\text{Sn}_{1-y}\text{Si}_y)_{0.93}(\text{Na}_2\text{S})_{0.07}$  ( $y = 0.1, 0.2$ ) compounds.

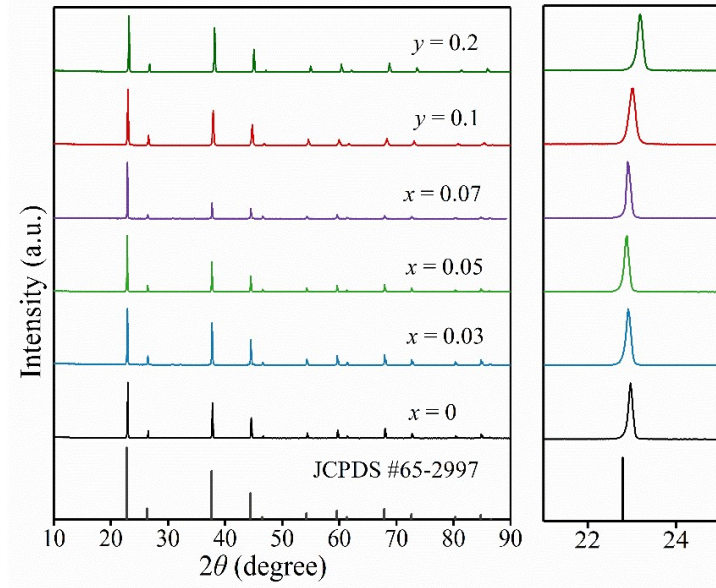

**Figure S3** XRD patterns for the  $(\text{Mg}_2\text{Sn})_{1-x}(\text{Na}_2\text{S})_x$  ( $x = 0, 0.03, 0.05, 0.07$ ) sample, and  $(\text{Mg}_2\text{Sn}_{1-y}\text{Si}_y)_{0.93}(\text{Na}_2\text{S})_{0.07}$  ( $y = 0.1, 0.2$ ) samples. All the diffraction peaks can be indexed to  $\text{Mg}_2\text{Sn}$  phase with an anti-fluorite structure.

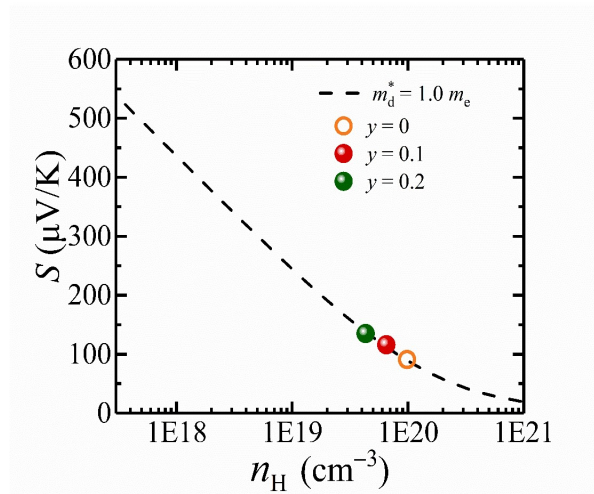

**Figure S4** The relationship between Seebeck coefficient and carrier concentration of  $(\text{Mg}_2\text{Sn}_{1-y}\text{Si}_y)_{0.93}(\text{Na}_2\text{S})_{0.07}$  ( $y = 0, 0.1, 0.2$ ) compounds. The dashed line is the Pisarenko curve calculated by the SPB model ( $m^* = 1.0 m_e$ ).

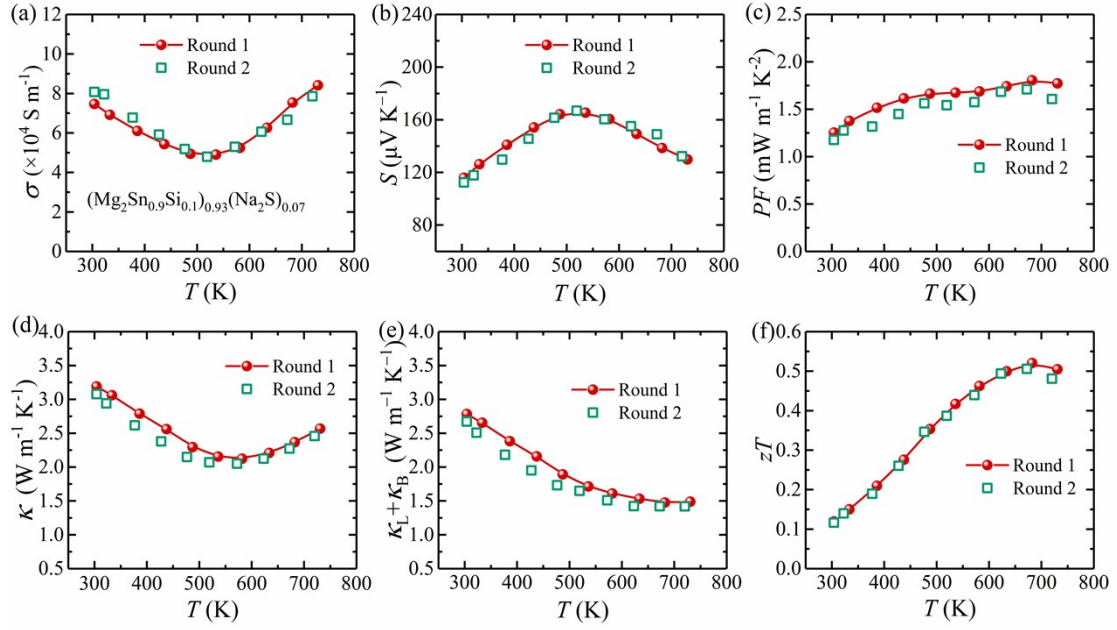

**Figure S5** The temperature-dependent (a) electrical conductivity, (b) Seebeck coefficient, (c) power factor, (d) total thermal conductivity, (e) lattice and bipolar thermal conductivity, and (f)  $zT$  values of  $(\text{Mg}_2\text{Sn}_{0.9}\text{Si}_{0.1})_{0.93}(\text{Na}_2\text{S})_{0.07}$  measured during two consecutive cycles during heating up to 723 K.

**Table S1** Room temperature properties of the  $(\text{Mg}_2\text{Sn})_{1-x}(\text{Na}_2\text{S})_x$  ( $x = 0, 0.03, 0.05, 0.07$ ), and  $(\text{Mg}_2\text{Sn}_{1-y}\text{Si}_y)_{0.93}(\text{Na}_2\text{S})_{0.07}$  ( $y = 0.1, 0.2$ ) compounds.

| Composition | carrier concentration<br>( $\text{cm}^{-3}$ ) | Hall mobility<br>( $\text{cm}^2 \text{V}^{-1} \text{s}^{-1}$ ) | Effective mass<br>( $\text{cm}^2 \text{V}^{-1} \text{s}^{-1}$ ) |
|-------------|-----------------------------------------------|----------------------------------------------------------------|-----------------------------------------------------------------|
| $x = 0$     | $-5.3 \times 10^{18}$                         | 153                                                            | 1.0                                                             |
| $x = 0.03$  | $2.8 \times 10^{19}$                          | 82                                                             | 1.0                                                             |
| $x = 0.05$  | $3.1 \times 10^{19}$                          | 93                                                             | 1.1                                                             |
| $x = 0.07$  | $9.8 \times 10^{19}$                          | 69                                                             | 1.1                                                             |
| $y = 0.1$   | $6.5 \times 10^{19}$                          | 77                                                             | 1.1                                                             |
| $y = 0.2$   | $4.3 \times 10^{19}$                          | 75                                                             | 1.2                                                             |

**Table S2** Room temperature physical parameters of  $(\text{Mg}_2\text{Sn}_{0.9}\text{Si}_{0.1})_{0.93}(\text{Na}_2\text{S})_{0.07}$  used to calculate  $\kappa_L$  based on different scattering process mentioned above.

| Parameter                                               | Values                |
|---------------------------------------------------------|-----------------------|
| Longitudinal sound velocity $v_l$ ( $\text{m s}^{-1}$ ) | 4324                  |
| Transverse sound velocity $v_t$ ( $\text{m s}^{-1}$ )   | 3601                  |
| Average sound velocity $v$ ( $\text{m s}^{-1}$ )        | 3787                  |
| Gruneisen parameter $\gamma$                            | 1.41                  |
| Debye temperature $\theta_D$ (K)                        | 270                   |
| Average atomic volume $V$ ( $\text{m}^3$ )              | $7.5 \times 10^{-29}$ |
| Grain size $L$ ( $\mu\text{m}$ )                        | 1                     |

## References

1. J.-W. Shen, Z.-W. Chen, S.-Q. Lin, L.-L. Zheng, W. Li and Y.-Z. Pei, *J. Mater. Chem. C*, 2015, **4**, 209–214.
2. J. Callaway, and H. C. von Baeyer, *Phys. Rev.*, 1960, **120**, 1149–1154.
3. H.-Y. Xie, S.-Q. Hao, S.-T. Cai, T. P. Bailey, C. Uher, C. Wolverton, V. P. Dravid, and M. G. Kanatzidis, *Energy Environ. Sci.*, 2020, **13**, 3693–3705.
4. D. T. Morelli, J. P. Heremans, and G. A. Slack, *Phys. Rev. B*, 2002, **66**, 195304.
